# Supplementary material for: Characteristics of methanesulfonic acid, non-sea-salt sulfate and organic carbon aerosols over the Amundsen Sea, Antarctica
Source: Copernicus journal article supplement (doi:10.5194/acp-20-5405-2020), 2020-05-08
Supplement: Supplementary file 1 [file acp-20-5405-2020-supplement.pdf]

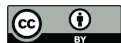

*Supplement of*

## **Characteristics of methanesulfonic acid, non-sea-salt sulfate and organic carbon aerosols over the Amundsen Sea, Antarctica**

**Jinyoung Jung et al.**

*Correspondence to:* Jinyoung Jung ([jinyoungjung@kopri.re.kr](mailto:jinyoungjung@kopri.re.kr))

The copyright of individual parts of the supplement might differ from the CC BY 4.0 License.

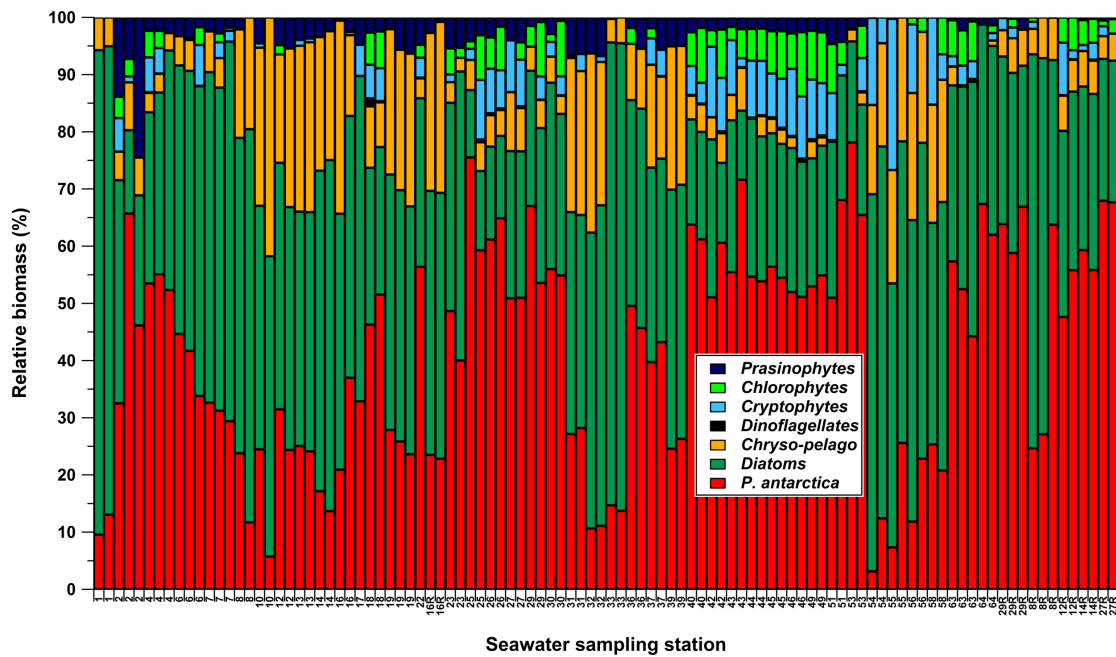

**Figure S1.** Relative biomass (%) of phytoplankton groups observed in the upper 50 m of the Amundsen Sea during the ANA06B cruise.

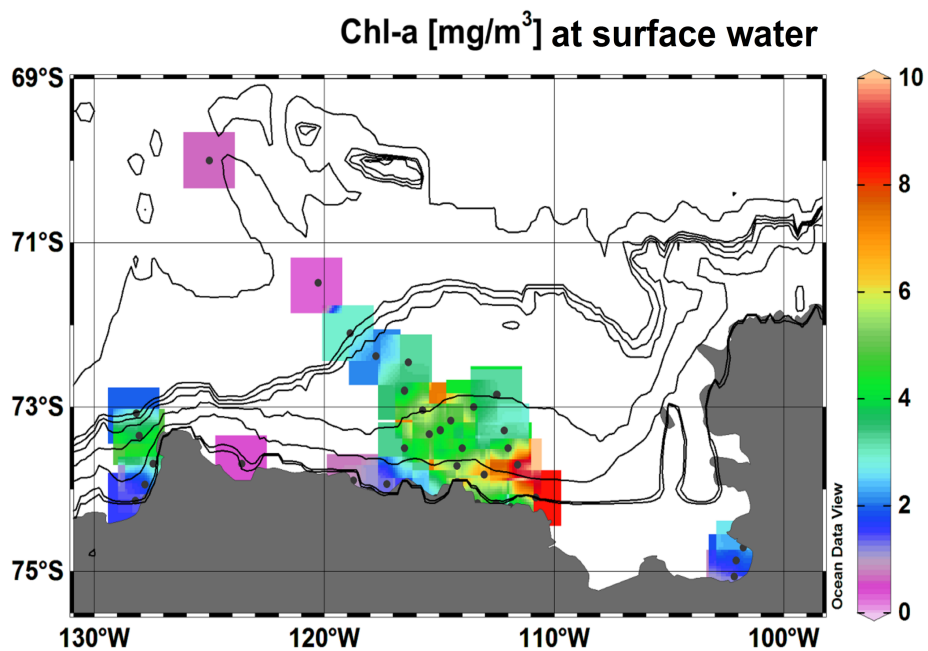

**Figure S2.** In situ sea surface chlorophyll-a (Chl-a) concentration ( $\text{mg m}^{-3}$ ) observed in the Amundsen Sea during the ANA06B cruise.

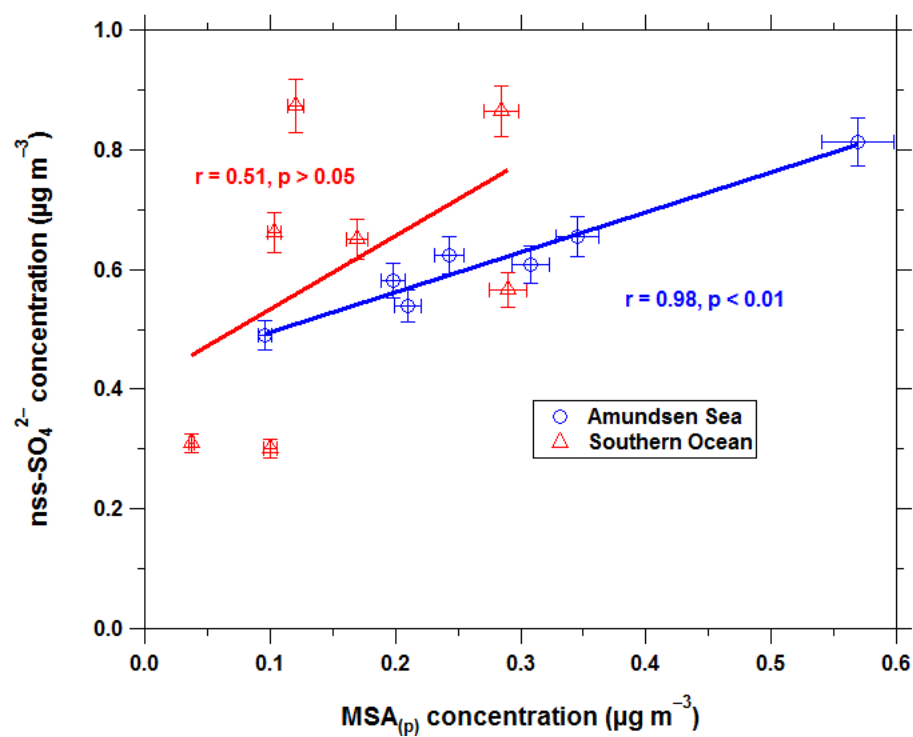

**Figure S3.** Relationships between  $\text{nss-SO}_4^{2-}$  and  $\text{MSA}_{(\text{p})}$  observed over the Southern Ocean (open triangles) and the Amundsen Sea (open circles).
